# Supplementary material
Source: publisher figshare collection journal article supplement (https://acs.figshare.com/ndownloader/files/3951889)
Supplement: Supplementary file 1 [file 3951889]

## Primary Structure Control of Oligomers Based on Natural and Synthetic Building Blocks

Delphine Chan-Seng,\* Jean-François Lutz

Institut Charles Sadron, UPR22/CNRS, 23 rue du Loess, BP 84047, 67034 Strasbourg Cedex 2, France

### Table of contents

|                                                                                                                                 |    |
|---------------------------------------------------------------------------------------------------------------------------------|----|
| Experimental section                                                                                                            | 2  |
| 1. Materials                                                                                                                    | 2  |
| 2. Characterization                                                                                                             | 2  |
| 3. Synthesis of azidocarboxylic acids                                                                                           | 3  |
| 4. Synthesis of azidoamino acids                                                                                                | 4  |
| 5. Synthesis of azidopeptides                                                                                                   | 7  |
| 6. Synthesis of sequence-defined oligomers based on natural and synthetic building blocks                                       | 9  |
| 7. Optimized reaction conditions for the synthesis of sequence-defined oligomers based on natural and synthetic building blocks | 13 |
| 8. Removal of the protecting groups of the model sequence-defined oligomer                                                      | 14 |
| Figure S1                                                                                                                       | 15 |
| Figure S2                                                                                                                       | 16 |
| Figure S3                                                                                                                       | 17 |
| Figure S4                                                                                                                       | 17 |
| Figure S5                                                                                                                       | 18 |

## Experimental section

### 1. Materials

Chlorotriyl chloride resin ( $1.6 \text{ mmol.g}^{-1}$ , 100-200 mesh), 2-(1H-benzotriazol-1-yl)-1,1,3,3-tetramethyluronium hexafluorophosphate (HBTU, 99%), Fmoc-L-Lys(Boc)-OH (>99%), Fmoc-Gly-OH (>98%), Fmoc-L-Val-OH (>98%) and Fmoc-L-Cys(Trt)-OH (99%) were purchased from Iris Biotech GmbH. Sodium azide ( $\text{NaN}_3$ , 99%), 1-hydroxybenzotriazole hydrate (HOBt, >97%), Fmoc-L-Leu-OH (>97%), piperidine (99%), copper(I) bromide ( $\text{CuBr}$ , 98%), acetic acid (99.8%), *N,N,N',N',N''*-pentamethyldiethylenetriamine (PMDETA, 99%), triisopropylsilane (TIPS, 99%), hydrochloric acid (concentrated HCl, 37% in water), 2,4,6-trihydroxyacetophenone (THAP, matrix substance for MALDI-MS,  $\geq 99.5\%$ ), cesium chloride ( $\text{CsCl}$ , 99.9%), anhydrous dichloromethane ( $\text{CH}_2\text{Cl}_2$ , anhydrous, >99.8%), anhydrous dimethylformamide (DMF, anhydrous, 99.8%) and dimethylformamide (DMF, >99%) were purchased from Aldrich. Bromoacetic acid (98+%), 6-bromohexanoic acid (98+%), 2-bromoisobutyric acid (98%), *N*-ethyldiisopropylamine (DIPEA, 99%), propargylamine (>95%), trifluoroacetic acid (TFA, 99%), and 2,2,2-trifluoroethanol (TFE, 99+%) were purchased from Alfa Aesar. 3-Bromoisobutyric acid (>97%) was purchased from TCI. Fmoc-L-Pro-OH was purchased from Novabiochem. Dichloromethane ( $\text{CH}_2\text{Cl}_2$ , RE, pure stabilized with amylene), methanol (RPE, for analysis, ACS reagent), diethyl ether (RE, pure stabilized with BHT) and acetone (RE, pure) were purchased from Carlo Erba. All the reagents were used as received except if otherwise noted. Copper(I) bromide was purified by stirring in acetic acid overnight, washing with methanol, and drying under vacuum at room temperature. All the syntheses on solid support were performed in solid phase extraction (SPE) tubes (12 mL polypropylene SPE tubes with polyethylene frits, 20  $\mu\text{m}$  porosity purchased from SUPELCO<sup>®</sup>) and shaken using a modified IKA KS 130 basic shaker.

### 2. Characterization

Nuclear magnetic resonance (NMR) spectra were recorded in  $\text{CDCl}_3$ ,  $\text{DMSO}-d_6$  or  $\text{D}_2\text{O}$  on a Bruker Avance 400 MHz spectrometer equipped with Ultrashield magnets.

Fourier transform infrared (FTIR) spectra were recorded on a Bruker Vertex 70 spectrometer using the attenuated total reflectance (ATR) technique.

Electrospray ionization mass spectrometry (ESI-MS) experiments were performed on a Bruker Daltonics microTOF spectrometer equipped with an orthogonal electrospray (ESI) interface. Calibration was performed using a solution of 10 mM sodium formate. Sample solutions were introduced into the spectrometer source with a syringe pump (Harvard type 55 1111: Harvard Apparatus Inc., South Natick, MA, USA) with a flow rate of 4  $\mu\text{L} \cdot \text{min}^{-1}$ .

Matrix-assisted laser desorption/ionization time-of-flight (MALDI-ToF) mass spectrometry experiments were performed on a Bruker Daltonics Autoflex spectrometer. Sample preparation was performed using the dried droplet method using a mixture of 0.5  $\mu\text{L}$  of sample solution (2 mg of sample in 1 mL of 1/1 acetonitrile/water) with 1  $\mu\text{L}$  of matrix solution (10 mg of 2,4,6-trihydroxyacetophenone and 10 mg of CsCl in 1 mL of 1/1 acetonitrile/water) dried at room temperature.

### 3. Synthesis of azidocarboxylic acid

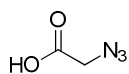

azidoacetic acid

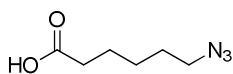

6-azidohexanoic acid

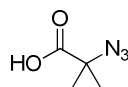

2-azidoisobutyric acid

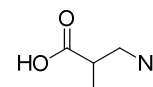

3-azido-2-methylpropionic acid

Typical syntheses of azidocarboxylic acid were conducted by combining bromocarboxylic acid (54 mmol),  $\text{NaN}_3$  (8.8 g, 135 mmol), water (100 mL) and acetone (20 mL) in a round bottom flask, which was then placed in an oil bath thermostated at 60  $^{\circ}\text{C}$ . The reaction mixture was stirred at this temperature for 6 h. The reaction mixture was then acidified by addition of concentrated HCl until pH 2 was reached and extracted 3 times with ethyl acetate. The organic phase was washed with Brine, dried over  $\text{Na}_2\text{SO}_4$ , concentrated by rotary evaporation and dried under vacuum at room temperature overnight.

Caution: organic azides are potentially-explosive substances. Routine precautions were taken to minimize the effect of possible explosions at all stages in the preparation and handling of azidocarboxylic acids.

**3.1. Azidoacetic acid.** Synthesized from bromoacetic acid and stored as a solution in DMF. 92% yield.  $^1\text{H}$  NMR:  $\delta$  ( $\text{CDCl}_3$ , 7.26 ppm) 9.28 (s, 1H), 3.96 (s, 2H).  $^{13}\text{C}$  NMR:  $\delta$  ( $\text{CDCl}_3$ , 77.16 ppm) 174.02, 50.13. FTIR:  $2106\text{ cm}^{-1}$ .

**3.2. 6-Azidohexanoic acid.** Synthesized from 6-bromohexanoic acid. 96% yield.  $^1\text{H}$  NMR:  $\delta$  ( $\text{CDCl}_3$ , 7.26 ppm) 11.02 (s, 1H), 3.26 (t, 2H), 2.35 (t, 2H), 1.54-1.71 (m, 4H), 1.35-1.47 (m, 2H).  $^{13}\text{C}$  NMR:  $\delta$  ( $\text{CDCl}_3$ , 77.16 ppm) 180.07, 51.24, 33.90, 28.87, 26.27, 24.19. FTIR:  $2093\text{ cm}^{-1}$ .

**3.3. 2-Azidoisobutyric acid.** Synthesized from 2-bromoisobutyric acid. 59% yield.  $^1\text{H}$  NMR:  $\delta$  ( $\text{CDCl}_3$ , 7.26 ppm) 9.56 (s, 1H), 1.52 (s, 6H).  $^{13}\text{C}$  NMR:  $\delta$  ( $\text{CDCl}_3$ , 77.16 ppm) 179.17, 62.97, 24.38. FTIR:  $2093\text{ cm}^{-1}$ .

**3.4. 3-Azido-2-methylpropionic acid.** Synthesized from 3-bromoisobutyric acid. 91% yield.  $^1\text{H}$  NMR:  $\delta$  ( $\text{CDCl}_3$ , 7.26 ppm) 11.09 (s, 1H), 3.35-3.59 (m, 2H), 2.63-2.77 (m, 1H), 1.24 (s, 3H).  $^{13}\text{C}$  NMR:  $\delta$  ( $\text{CDCl}_3$ , 77.16 ppm) 180.45, 53.40, 39.67, 14.49. FTIR:  $2098\text{ cm}^{-1}$ .

#### 4. Synthesis of azidoamino acids

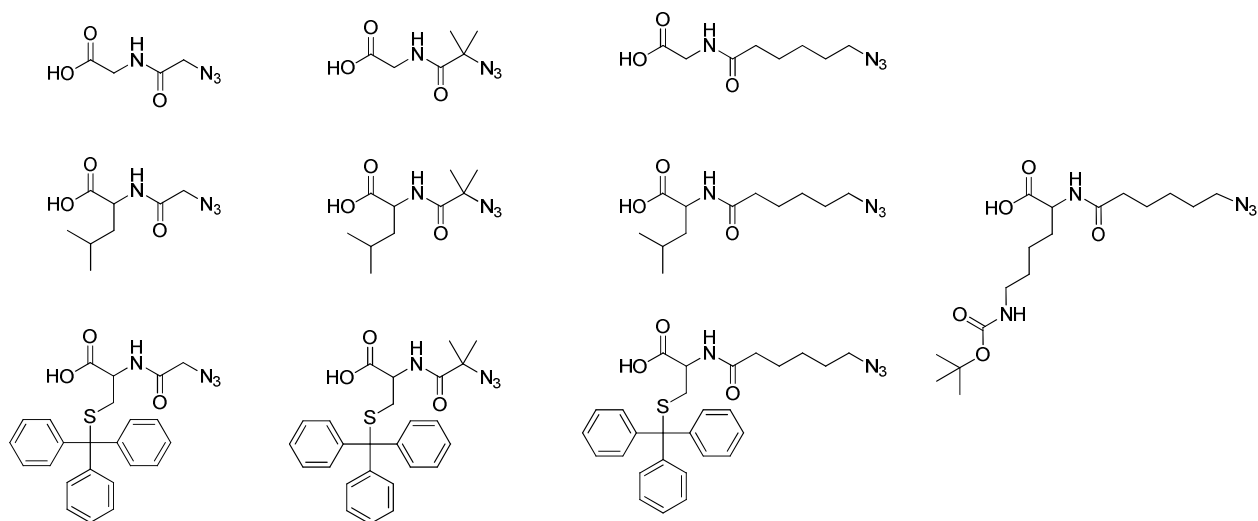

1.28 g of chlorotrityl chloride resin (2.0 mmol of functional groups) was weighted in a SPE vessel, swollen in  $\text{CH}_2\text{Cl}_2$  for 10 min and washed 3 times with  $\text{CH}_2\text{Cl}_2$ . Fmoc-amino acid-OH (6.1 mmol) was added to the vessel, which was then degased by performing 3 vacuum/argon cycles. 7 mL of anhydrous  $\text{CH}_2\text{Cl}_2$  was added to the vessel followed by 2.1 mL of DIPEA (12.1 mmol). The solution was

agitated for 1 h under argon. The solution was filtered and the resin was washed 6 times with DMF. 7 mL of a 80/15/5 CH<sub>2</sub>Cl<sub>2</sub>/methanol/DIPEA solution was agitated for 10 min (twice), and the resin was subsequently washed with DMF 6 times. The Fmoc-protecting groups were removed by agitation for 3 min with 7 mL of a 25% piperidine cleavage solution in DMF followed by filtration and agitation with a fresh cleavage solution for 20 min. The resin was then washed 6 times with DMF, 6 times with CH<sub>2</sub>Cl<sub>2</sub>, 3 times with methanol and 3 times with CH<sub>2</sub>Cl<sub>2</sub>. The resin was dried overnight under vacuum at room temperature. The loading density of amino acid grafted on the resin was determined by gravimetric analysis (typically 1.0 to 1.4 mmol.g<sup>-1</sup>).

Azidocarboxylic acid (5.0 mmol, 3 eq. relative to the loading determined), HBTU (1.9 g, 5.0 mmol), HOBt (0.7 g, 5.0 mmol), DIPEA (1.8 mL, 10.3 mmol) and anhydrous DMF (7 mL) were added to the peptide vessel (1.7 mmol loading density), and agitated for 1 h. After filtration, the resin was washed 6 times with DMF and 6 times with CH<sub>2</sub>Cl<sub>2</sub>.

The azidoamino acid was cleaved from the resin by adding a 4/1 CH<sub>2</sub>Cl<sub>2</sub>/TFE solution to the peptide vessel for 45 min (twice). The resin was filtered, washed three times with CH<sub>2</sub>Cl<sub>2</sub>, and the filtrates were collected in a clean round-bottom flask. The solution was concentrated by rotary evaporation.

**4.1. Gly-acetyl-N<sub>3</sub>.** Synthesized from Fmoc-Gly-OH and azidoacetic acid. 59% yield. <sup>1</sup>H NMR: δ (DMSO-*d*<sub>6</sub>, 2.50 ppm) 9.04 (bs, 1H), 8.38 (t, 1H), 3.88 (s, 2H), 3.79 (d, 2H). <sup>13</sup>C NMR: δ (DMSO-*d*<sub>6</sub>, 39.52 ppm) 171.02, 167.81, 50.77, 40.85. FTIR: 2108 cm<sup>-1</sup>. ESI (m/z): [M-H]<sup>-</sup> calculated from C<sub>4</sub>H<sub>5</sub>N<sub>4</sub>O<sub>3</sub>, 157.04; found, 157.04.

**4.2. Gly-isobutyryl-N<sub>3</sub>.** Synthesized from Fmoc-Gly-OH and 2-azidoisobutyric acid. 75% yield. <sup>1</sup>H NMR: δ (DMSO-*d*<sub>6</sub>, 2.50 ppm) 10.51 (bs, 1H), 8.22 (t, 1H), 3.73 (d, 2H), 1.40 (s, 6H). <sup>13</sup>C NMR: δ (DMSO-*d*<sub>6</sub>, 39.52 ppm) 172.25, 170.84, 63.66, 41.04, 24.24. FTIR: 2111 cm<sup>-1</sup>. ESI (m/z): [M+Na]<sup>+</sup> calculated from C<sub>6</sub>H<sub>10</sub>N<sub>4</sub>O<sub>3</sub>Na, 209.07; found, 209.06.

**4.3. Gly-hexyl-N<sub>3</sub>.** Synthesized from Fmoc-Gly-OH and 6-azidohexanoic acid. 67% yield. <sup>1</sup>H NMR: δ (DMSO-*d*<sub>6</sub>, 2.50 ppm) 12.29 (bs, 1H), 8.08 (t, 1H), 3.72 (d, 2H), 3.30 (t, 2H), 2.12 (t, 2H), 1.44-1.60 (m, 4H), 1.24-1.38 (m, 2H). <sup>13</sup>C NMR: δ (DMSO-*d*<sub>6</sub>, 39.52 ppm) 172.39, 171.41, 50.57, 40.56, 34.86,

27.98, 25.72, 24.67. FTIR: 2100  $\text{cm}^{-1}$ . ESI (m/z):  $[\text{M-H}]^-$  calculated from  $\text{C}_8\text{H}_{13}\text{N}_4\text{O}_3$ , 213.10; found, 213.09.

4.4. *Leu-acetyl-N<sub>3</sub>*. Synthesized from Fmoc-Leu-OH and azidoacetic acid. 50% yield.  $^1\text{H}$  NMR:  $\delta$  ( $\text{DMSO-}d_6$ , 2.50 ppm) 12.40 (bs, 1H), 8.35 (d, 1H), 4.20-4.30 (m, 1H), 3.86 (s, 2H), 1.57-1.70 (m, 1H), 1.46-1.57 (m, 2H), 0.90 (d, 3H), 0.86 (d, 3H).  $^{13}\text{C}$  NMR:  $\delta$  ( $\text{DMSO-}d_6$ , 39.52 ppm) 173.68, 167.43, 50.49, 50.36, 24.30, 22.79, 21.29. FTIR: 2113  $\text{cm}^{-1}$ . ESI (m/z):  $[\text{M-H}]^-$  calculated from  $\text{C}_8\text{H}_{13}\text{N}_4\text{O}_3$ , 213.10; found, 213.08.

4.5. *Leu-isobutyryl-N<sub>3</sub>*. Synthesized from Fmoc-Leu-OH and 2-azidoisobutyric acid. 57% yield.  $^1\text{H}$  NMR:  $\delta$  ( $\text{DMSO-}d_6$ , 2.50 ppm) 12.05 (bs, 1H), 8.00 (d, 1H), 4.16-4.33 (m, 1H), 1.45-1.76 (m, 3H), 1.41 (s, 3H), 1.39 (s, 3H), 0.88 (d, 3H), 0.83 (d, 3H).  $^{13}\text{C}$  NMR:  $\delta$  ( $\text{DMSO-}d_6$ , 39.52 ppm) 173.71, 171.93, 63.84, 50.57, 24.45, 24.22, 22.93, 21.08. FTIR: 2103  $\text{cm}^{-1}$ . ESI (m/z):  $[\text{M-H}]^-$  calculated from  $\text{C}_{10}\text{H}_{17}\text{N}_4\text{O}_3$ , 241.13; found, 241.13.

4.6. *Leu-hexyl-N<sub>3</sub>*. Synthesized from Fmoc-Leu-OH and 6-azidohexanoic acid. 64% yield.  $^1\text{H}$  NMR:  $\delta$  ( $\text{DMSO-}d_6$ , 2.50 ppm) 12.40 (bs, 1H), 8.00 (d, 1H), 4.14-4.28 (m, 1H), 3.23-3.35 (t, 2H), 2.04-2.19 (m, 2H), 1.57-1.69 (m, 1H), 1.41-1.57 (m, 6H), 1.21-1.38 (m, 2H), 0.88 (d, 3H), 0.83 (d, 3H).  $^{13}\text{C}$  NMR:  $\delta$  ( $\text{DMSO-}d_6$ , 39.52 ppm) 174.27, 172.07, 50.62, 50.05, 34.84, 27.96, 25.67, 24.75, 24.34, 22.85, 21.20. FTIR: 2091  $\text{cm}^{-1}$ . ESI (m/z):  $[\text{M-H}]^-$  calculated from  $\text{C}_{12}\text{H}_{21}\text{N}_4\text{O}_3$ , 269.16; found, 269.17.

4.7. *Cys(Trt)-acetyl-N<sub>3</sub>*. Synthesized from Fmoc-Cys(Trt)-OH and azidoacetic acid. 69% yield.  $^1\text{H}$  NMR:  $\delta$  ( $\text{DMSO-}d_6$ , 2.50 ppm) 10.90 (bs, 1H), 8.49 (d, 1H), 7.18-7.46 (m, 15H), 4.17-4.26 (m, 1H), 3.88 (s, 2H), 2.39-2.62 (m, 2H).  $^{13}\text{C}$  NMR:  $\delta$  ( $\text{DMSO-}d_6$ , 39.52 ppm) 171.20, 167.31, 144.15, 129.06, 128.06, 126.82, 66.16, 51.42, 50.46, 33.06. FTIR: 2113  $\text{cm}^{-1}$ . ESI (m/z):  $[\text{M-H}]^-$  calculated from  $\text{C}_{24}\text{H}_{21}\text{N}_4\text{O}_3\text{S}$ , 445.13; found, 445.13.

4.8. *Cys(Trt)-isobutyryl-N<sub>3</sub>*. Synthesized from Fmoc-Cys(Trt)-OH and 2-azidoisobutyric acid. 90% yield.  $^1\text{H}$  NMR:  $\delta$  ( $\text{DMSO-}d_6$ , 2.50 ppm) 12.07 (bs, 1H), 8.17 (d, 1H), 7.19-7.40 (m, 15H), 4.08-4.17 (m, 1H), 2.41-2.76 (m, 2H), 1.42 (s, 3H), 1.41 (s, 3H).  $^{13}\text{C}$  NMR:  $\delta$  ( $\text{DMSO-}d_6$ , 39.52 ppm) 171.76, 171.28,

144.28, 129.08, 128.04, 126.79, 66.10, 63.79, 51.71, 32.67, 24.22, 24.14. FTIR: 2114  $\text{cm}^{-1}$ . ESI (m/z):  $[\text{M-H}]^-$  calculated from  $\text{C}_{26}\text{H}_{25}\text{N}_4\text{O}_3\text{S}$ , 473.16; found, 473.16.

**4.9. Cys(Trt)-hexyl- $\text{N}_3$ .** Synthesized from Fmoc-Cys(Trt)-OH and 6-azidohexanoic acid. 74% yield.  $^1\text{H}$  NMR:  $\delta$  (DMSO- $d_6$ , 2.50 ppm) 10.55 (bs, 1H), 8.17 (d, 1H), 7.17-7.46 (m, 15H), 4.14-4.24 (m, 1H), 3.25 (t, 2H), 2.36-2.55 (m, 2H), 2.08-2.17 (m, 2H), 1.44-1.57 (m, 4H), 1.24-1.36 (m, 2H).  $^{13}\text{C}$  NMR:  $\delta$  (DMSO- $d_6$ , 39.52 ppm) 171.96, 171.78, 144.24, 129.05, 128.02, 126.77, 66.02, 51.16, 50.55, 34.77, 27.94, 25.59, 24.69. FTIR: 2093  $\text{cm}^{-1}$ . ESI (m/z):  $[\text{M-H}]^-$  calculated from  $\text{C}_{28}\text{H}_{29}\text{N}_4\text{O}_3\text{S}$ , 501.20; found, 501.17.

**4.10. Lys(Boc)-hexyl- $\text{N}_3$ .** Synthesized from Fmoc-Lys(Boc)-OH and 6-azidohexanoic acid. 88% yield.  $^1\text{H}$  NMR:  $\delta$  (DMSO- $d_6$ , 2.50 ppm) 12.20 (bs, 1H), 7.99 (d, 1H), 6.27-6.89 (m, 1H), 4.06-4.22 (m, 1H), 3.30 (t, 2H), 2.82-2.95 (m, 2H), 2.05-2.17 (m, 2H), 1.60-1.73 (m, 2H), 1.44-1.74 (m, 6H), 1.37 (s, 9H), 1.18-1.34 (m, 6H).  $^{13}\text{C}$  NMR:  $\delta$  (DMSO- $d_6$ , 39.52 ppm) 173.83, 172.13, 155.57, 77.33, 51.70, 50.58, 34.83, 30.76, 29.10, 28.26, 27.97, 25.70, 24.75, 22.82. FTIR: 2094  $\text{cm}^{-1}$ . ESI (m/z):  $[\text{M}+\text{Na}]^+$  calculated from  $\text{C}_{17}\text{H}_{31}\text{N}_5\text{O}_5\text{Na}$ , 408.22; found, 408.22.

## 5. Synthesis of azidopeptides

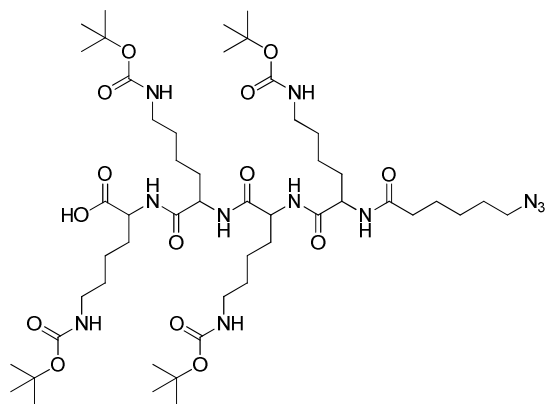

Lys(Boc)-Lys(Boc)-Lys(Boc)-Lys(Boc)-hexyl- $\text{N}_3$

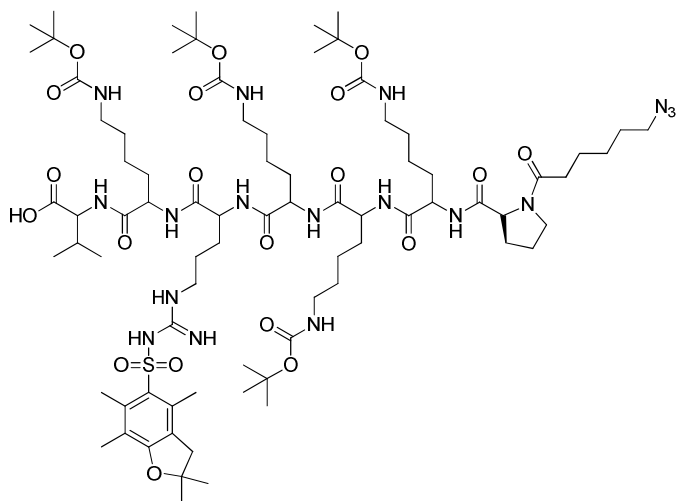

Val-Lys(Boc)-Arg(Pbf)-Lys(Boc)-Lys(Boc)-Lys(Boc)-Pro-hexyl- $\text{N}_3$

Azidopeptides were prepared similarly to azidoamino acids by solid-phase peptide synthesis through successive additions of amino acid in the desired order followed by end-capping with 6-azidohexanoic acid and cleavage from the resin.

**5.1. *Lys(Boc)-Lys(Boc)-Lys(Boc)-Lys(Boc)-hexyl-N<sub>3</sub>*.** The chlorotrityl chloride resin was loaded with Fmoc-Lys(Boc)-OH. The remaining lysine residues were successively coupled to the lysine functionalized resin using HBTU and HOBt as coupling agent. The peptide was end-functionalized with 6-azidohexanoic acid and cleaved from the resin using a CH<sub>2</sub>Cl<sub>2</sub>/TFE (4/1) solution. 70% yield. <sup>1</sup>H NMR: δ (DMSO-*d*<sub>6</sub>, 2.50 ppm) 12.42 (bs, 1H), 7.73-8.05 (m, 4H), 6.25-6.85 (m, 4H), 4.07-4.32 (m, 4H), 3.31 (t, 2H), 2.80-2.95 (m, 8H), 2.06-2.21 (m, 2H), 1.13-1.79 (m, 66H). <sup>13</sup>C NMR: δ (DMSO-*d*<sub>6</sub>, 39.52 ppm) 173.39, 172.16, 171.81, 171.42, 171.24, 155.52, 77.28, 52.53, 52.36, 52.19, 51.82, 50.54, 34.95, 31.79, 31.58, 30.77, 29.23, 28.24, 27.97, 25.73, 24.74, 22.75, 22.65, 22.50. FTIR: 2095 cm<sup>-1</sup>. ESI (m/z): [M+Na]<sup>+</sup> calculated from C<sub>50</sub>H<sub>91</sub>N<sub>11</sub>O<sub>14</sub>Na, 1092.66; found, 1092.66.

**5.2. *Val-Lys(Boc)-Arg(Pbf)-Lys(Boc)-Lys(Boc)-Lys(Boc)-Pro-hexyl-N<sub>3</sub>*.** Val-Lys(Boc)-Arg(Pbf)-Lys(Boc)-Lys(Boc)-Lys(Boc)-Pro-hexyl-N<sub>3</sub> was prepared similarly to azidoamino acids by solid-phase peptide synthesis. The chlorotrityl chloride resin was loaded with Fmoc-Val-OH. The remaining amino acids were successively coupled to the valine functionalized resin using HBTU and HOBt as coupling agent in the following order: Fmoc-Lys(Boc)-OH, Fmoc-Arg(Pbf)-OH, Fmoc-Lys(Boc)-OH, Fmoc-Lys(Boc)-OH, Fmoc-Lys(Boc)-OH and Fmoc-Pro-OH. The peptide was end-functionalized with 6-azidohexanoic acid and cleaved from the resin using a CH<sub>2</sub>Cl<sub>2</sub>/TFE (4/1) solution. 81% yield. <sup>1</sup>H NMR: δ (DMSO-*d*<sub>6</sub>, 2.50 ppm) 12.52 (bs, 1H), 7.58-8.28 (m, 6H), 5.86-7.02 (m, 7H), 4.02-4.46 (m, 7H), 3.40-3.62 (m, 2H), 3.20-3.39 (m, 4H), 2.98-3.09 (m, 2H), 2.78-2.93 (m, 8H), 2.48 (s, 3H), 2.42 (s, 3H), 2.25-2.35 (m, 2H), 1.12-1.94 (m, 84H), 0.80-0.90 (m, 6H). <sup>13</sup>C NMR: δ (DMSO-*d*<sub>6</sub>, 39.52 ppm) 172.83, 172.20, 171.96, 171.79, 171.65, 171.59, 171.41, 171.08, 170.65, 157.44, 156.09, 155.51, 137.25, 134.25, 131.42, 124.26, 116.22, 86.22, 77.29, 52.69, 52.62, 52.45, 52.36, 52.07, 51.97, 50.60, 42.49, 33.56, 31.72, 30.92, 29.92, 29.23, 28.23, 28.13, 25.93, 25.88, 24.32, 23.86, 23.68, 22.74, 22.57, 18.99, 18.89, 17.91, 17.54, 12.22. FTIR: 2095 cm<sup>-1</sup>. ESI (m/z): [M-H]<sup>-</sup> calculated from C<sub>79</sub>H<sub>134</sub>N<sub>17</sub>O<sub>20</sub>S, 1672.97; found, 1672.96.



## 6. Synthesis of sequence-defined oligomers based on natural and synthetic building blocks

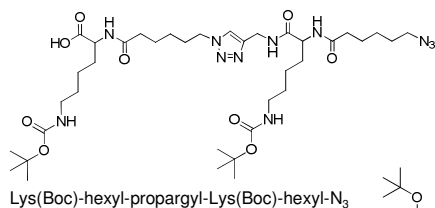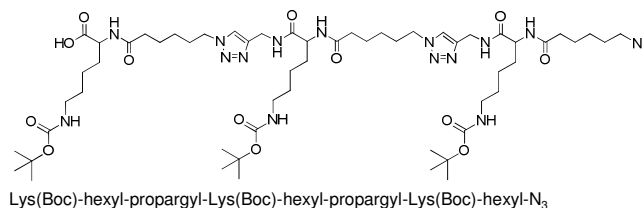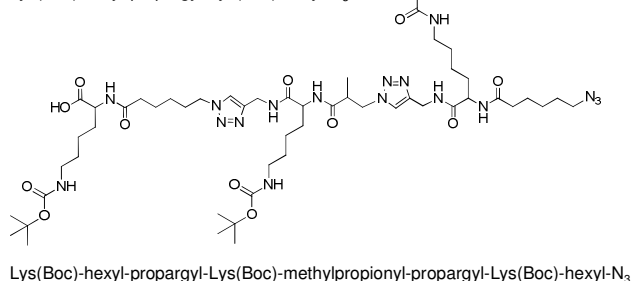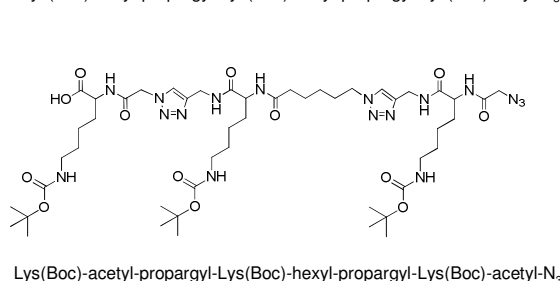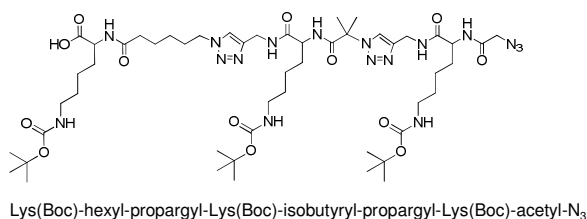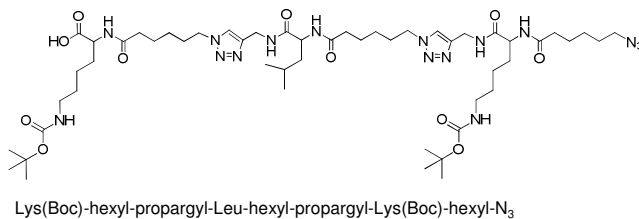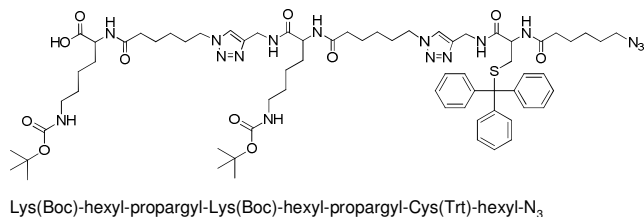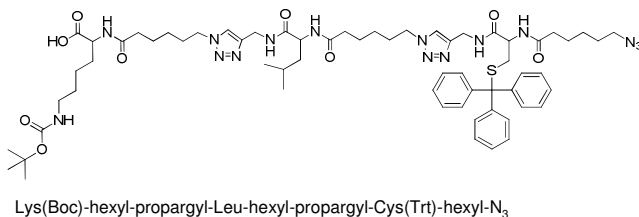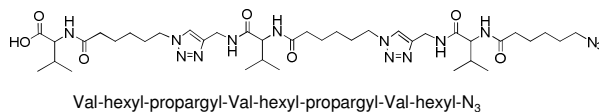

The chlorotrityl chloride resin was loaded with the desired Fmoc-amino acid-OH as described in Section 4. The oligomers were synthesized from successive additions of azidocarboxylic acid, propargylamine and Fmoc-amino acid-OH following the procedure described below until the desired oligomer ending with an azide was obtained.

i) Addition of azidocarboxylic acid. Azidocarboxylic acid (3 eq. relative to the loading), HBTU (3 eq. relative to the loading), HOBT (3 eq. relative to the loading), DIPEA (6 eq. relative to the loading) and

anhydrous DMF (5 mL per mmol of functional groups on the resin) were added to the peptide vessel, and agitated for 1 h. After filtration, the resin was washed 6 times with DMF and 6 times with CH<sub>2</sub>Cl<sub>2</sub>.

ii) Copper-assisted alkyne-azide cycloaddition with propargylamine. CuBr (3 eq. relative to the loading) was added to the peptide vessel, which was then degassed through 3 vacuum/argon cycles. Anhydrous CH<sub>2</sub>Cl<sub>2</sub> (7 mL per mmol of functional groups on the resin) were added to the peptide vessel, followed by PMDETA (6 eq. relative to the loading) and propargylamine (3 eq. relative to the loading). The solution was agitated under argon for 16 h. After filtration, the resin was washed 6 times with DMF and 6 times with CH<sub>2</sub>Cl<sub>2</sub>.

iii) Addition of Fmoc-amino acid-OH. Fmoc-amino acid-OH (3 eq. relative to the loading), HBTU (3 eq. relative to the loading), HOBT (3 eq. relative to the loading), DIPEA (6 eq. relative to the loading) and anhydrous DMF (5 mL per mmol of functional groups on the resin) were added to the peptide vessel, and agitated for 1 h. After filtration, the resin was washed 6 times with DMF. The Fmoc-protecting group was removed by agitation for 3 min with a 25% piperidine cleavage solution in DMF followed by filtration and agitation with a fresh cleavage solution for 20 min. The resin was then washed 6 times with DMF and 6 times with CH<sub>2</sub>Cl<sub>2</sub>.

Finally, the oligomer was cleaved from the resin by adding a 4/1 CH<sub>2</sub>Cl<sub>2</sub>/TFE solution to the peptide vessel for 45 min (twice). The resin was filtered, washed three times with CH<sub>2</sub>Cl<sub>2</sub>, and the filtrates were collected in a clean round-bottom flask. The solution was concentrated by rotary evaporation.

*6.1. Lys(Boc)-hexyl-propargyl-Lys(Boc)-hexyl-N<sub>3</sub>.* Synthesized from Fmoc-Lys(Boc)-OH and 6-azidohexanoic acid. 76% yield. <sup>1</sup>H NMR: δ (DMSO-*d*<sub>6</sub>, 2.50 ppm) 12.20 (bs, 1H), 7.69-8.48 (m, 4H), 6.24-6.86 (m, 2H), 4.07-4.37 (m, 6H), 3.29 (t, 2H), 2.78-2.97 (m, 4H), 1.98-2.22 (m, 4H), 1.06-1.90 (m, 42H). <sup>13</sup>C NMR: δ (DMSO-*d*<sub>6</sub>, 39.52 ppm) 172.16, 171.97, 155.61, 122.52, 77.36, 52.51, 50.58, 49.20, 48.62, 34.99, 34.88, 34.33, 31.70, 29.52, 29.20, 28.28, 28.00, 25.78, 25.46, 24.75, 24.65, 22.90, 22.80. ESI (m/z): [M+Na]<sup>+</sup> calculated from C<sub>37</sub>H<sub>65</sub>N<sub>11</sub>O<sub>9</sub>Na, 830.49; found, 830.49.

*6.2. Lys(Boc)-hexyl-propargyl-Lys(Boc)-hexyl-propargyl-Lys(Boc)-hexyl-N<sub>3</sub>.* Synthesized from Fmoc-Lys(Boc)-OH and 6-azidohexanoic acid. 60% yield. <sup>1</sup>H NMR: δ (DMSO-*d*<sub>6</sub>, 2.50 ppm) 11.50 (bs, 1H), 7.67-8.74 (m, 7H), 6.22-6.84 (m, 3H), 3.97-4.53 (m, 11H), 3.27 (t, 2H), 2.73-2.97 (m, 6H), 1.94-

2.20 (m, 6H), 0.96-1.90 (m, 63H).  $^{13}\text{C}$  NMR:  $\delta$  (DMSO- $d_6$ , 39.52 ppm) 172.35, 172.16, 172.06, 155.71, 144.91, 122.64, 77.45, 52.74, 50.66, 49.29, 48.66, 35.06, 34.41, 31.68, 31.26, 29.56, 29.22, 28.33, 28.05, 25.82, 25.51, 24.74, 24.66, 22.95, 22.84. ESI (m/z):  $[\text{M}+\text{Na}]^+$  calculated from  $\text{C}_{57}\text{H}_{99}\text{N}_{17}\text{O}_{13}\text{Na}$ , 1252.75; found, 1252.74.

6.3. *Lys(Boc)-hexyl-propargyl-Lys(Boc)-methylpropionyl-propargyl-Lys(Boc)-hexyl-N<sub>3</sub>*. Synthesized from Fmoc-Lys(Boc)-OH, 6-azidohexanoic acid, and 3-azido-2-methylpropionic acid. 75% yield.  $^1\text{H}$  NMR:  $\delta$  (DMSO- $d_6$ , 2.50 ppm) 10.90 (bs, 1H), 7.69-8.65 (m, 7H), 6.24-6.86 (m, 3H), 4.41-4.57 (m, 2H), 4.10-4.39 (m, 9H), 3.29 (t, 2H), 2.95-3.06 (m, 1H), 2.78-2.95 (m, 6H), 1.97-2.22 (m, 4H), 1.04-1.88 (m, 57H), 0.89-1.03 (m, 3H).  $^{13}\text{C}$  NMR:  $\delta$  (DMSO- $d_6$ , 39.52 ppm) 172.92, 172.66, 172.09, 171.88, 171.63, 155.58, 144.55, 122.54, 77.34, 52.60, 52.57, 52.42, 52.38, 52.06, 51.84, 50.56, 49.20, 48.60, 35.76, 34.99, 34.33, 34.21, 31.79, 30.79, 29.49, 29.20, 28.26, 27.99, 25.77, 25.44, 24.73, 24.65, 22.78, 15.54, 15.17. ESI (m/z):  $[\text{M}+\text{Na}]^+$  calculated from  $\text{C}_{55}\text{H}_{95}\text{N}_{17}\text{O}_{13}\text{Na}$ , 1224.72; found, 1224.71.

6.4. *Lys(Boc)-acetyl-propargyl-Lys(Boc)-hexyl-propargyl-Lys(Boc)-acetyl-N<sub>3</sub>*. Synthesized from Fmoc-Lys(Boc)-OH, 6-azidohexanoic acid, and azidoacetic acid. 69% yield.  $^1\text{H}$  NMR:  $\delta$  (DMSO- $d_6$ , 2.50 ppm) 12.10 (bs, 1H), 7.68-8.91 (m, 7H), 6.18-6.90 (m, 3H), 5.10-5.33 (m, 2H), 4.12-4.45 (m, 11H), 2.77-3.01 (m, 6H), 2.05-2.18 (m, 2H), 1.03-1.91 (m, 51H).  $^{13}\text{C}$  NMR:  $\delta$  (DMSO- $d_6$ , 39.52 ppm) 172.11, 171.94, 171.34, 167.40, 155.62, 144.59, 122.56, 77.39, 52.79, 52.42, 51.57, 50.60, 49.21, 34.97, 34.27, 31.78, 29.55, 29.20, 28.28, 25.55, 24.60, 22.80, 22.68. ESI (m/z):  $[\text{M}-\text{H}]^-$  calculated from  $\text{C}_{49}\text{H}_{82}\text{N}_{17}\text{O}_{13}$ , 1116.63; found, 1116.63.

6.5. *Lys(Boc)-hexyl-propargyl-Lys(Boc)-isobutyryl-propargyl-Lys(Boc)-acetyl-N<sub>3</sub>*. Synthesized from Fmoc-Lys(Boc)-OH, 6-azidohexanoic acid, 2-azidoisobutyric acid, and azidoacetic acid. 60% yield.  $^1\text{H}$  NMR:  $\delta$  (DMSO- $d_6$ , 2.50 ppm) 11.60 (bs, 1H), 7.68-8.65 (m, 7H), 6.18-6.89 (m, 3H), 4.16-4.45 (m, 9H), 3.22-3.37 (m, 2H), 2.78-2.97 (m, 6H), 2.02-2.20 (m, 2H), 0.94-1.92 (m, 57H).  $^{13}\text{C}$  NMR:  $\delta$  (DMSO- $d_6$ , 39.52 ppm) 171.96, 171.36, 170.57, 167.33, 155.56, 144.49, 122.44, 77.31, 64.64, 53.16, 52.76, 50.51, 49.18, 34.89, 34.36, 29.49, 29.19, 28.24, 25.59, 25.44, 24.62, 22.65. ESI (m/z):  $[\text{M}-\text{H}]^-$  calculated from  $\text{C}_{51}\text{H}_{86}\text{N}_{17}\text{O}_{13}$ , 1244.66; found, 1244.67.

6.6. *Lys(Boc)-hexyl-propargyl-Leu-hexyl-propargyl-Lys(Boc)-hexyl-N<sub>3</sub>*. Synthesized from Fmoc-Lys(Boc)-OH, Fmoc-Leu-OH, and 6-azidohexanoic acid. 80% yield. <sup>1</sup>H NMR:  $\delta$  (DMSO-*d*<sub>6</sub>, 2.50 ppm) 11.30 (bs, 1H), 7.66-8.60 (m, 7H), 6.22-6.84 (m, 2H), 4.13-4.50 (m, 11H), 3.29 (t, 2H), 2.78-2.95 (m, 4H), 1.99-2.21 (m, 6H), 1.07-1.88 (m, 51H), 0.86 (d, 3H), 0.81 (d, 3H). <sup>13</sup>C NMR:  $\delta$  (DMSO-*d*<sub>6</sub>, 39.52 ppm) 172.32, 172.12, 172.01, 171.91, 155.57, 144.74, 122.47, 77.32, 52.47, 50.97, 50.56, 49.17, 48.58, 40.84, 34.96, 34.91, 34.32, 31.66, 29.46, 29.23, 28.25, 27.96, 25.75, 25.44, 24.71, 24.64, 24.57, 24.25, 22.97, 21.46. ESI (m/z): [M+H]<sup>+</sup> calculated from C<sub>52</sub>H<sub>91</sub>N<sub>16</sub>O<sub>11</sub>, 1115.71; found, 1115.69.

6.7. *Lys(Boc)-hexyl-propargyl-Lys(Boc)-hexyl-propargyl-Cys(Trt)-hexyl-N<sub>3</sub>*. Synthesized from Fmoc-Lys(Boc)-OH, Fmoc-Cys(Trt)-OH, and 6-azidohexanoic acid. 57% yield. <sup>1</sup>H NMR:  $\delta$  (DMSO-*d*<sub>6</sub>, 2.50 ppm) 12.20 (bs, 1H), 7.64-8.63 (m, 7H), 7.10-7.42 (m, 15H), 6.20-6.88 (m, 2H), 4.09-4.50 (m, 11H), 3.23 (t, 2H), 2.79-2.92 (m, 4H), 1.98-2.21 (m, 6H), 1.01-1.91 (m, 50H). <sup>13</sup>C NMR:  $\delta$  (DMSO-*d*<sub>6</sub>, 39.52 ppm) 171.99, 155.50, 144.21, 129.01, 127.99, 127.76, 127.51, 122.44, 77.32, 65.71, 52.46, 50.55, 49.13, 34.89, 34.31, 31.72, 29.48, 29.25, 25.45, 24.64, 22.76. ESI (m/z): [M-H]<sup>-</sup> calculated from C<sub>68</sub>H<sub>97</sub>N<sub>16</sub>O<sub>11</sub>S, 1345.72; found, 1345.72.

6.8. *Lys(Boc)-hexyl-propargyl-Leu-hexyl-propargyl-Cys(Trt)-hexyl-N<sub>3</sub>*. Synthesized from Fmoc-Lys(Boc)-OH, Fmoc-Leu-OH, Fmoc-Cys(Trt)-OH, and 6-azidohexanoic acid. 55% yield. <sup>1</sup>H NMR:  $\delta$  (DMSO-*d*<sub>6</sub>, 2.50 ppm) 11.80 (bs, 1H), 7.64-8.65 (m, 7H), 7.08-7.62 (m, 15H), 6.20-6.87 (m, 1H), 4.09-4.71 (m, 11H), 3.29 (t, 2H), 2.78-2.92 (m, 2H), 1.99-2.21 (m, 6H), 0.97-1.90 (m, 38H), 0.85 (d, 3H), 0.80 (d, 3H). <sup>13</sup>C NMR:  $\delta$  (DMSO-*d*<sub>6</sub>, 39.52 ppm) 172.36, 172.07, 155.61, 144.31, 129.08, 127.79, 126.77, 122.57, 77.36, 65.81, 50.98, 50.57, 49.20, 40.88, 34.93, 34.35, 29.27, 28.28, 25.45, 24.68, 24.28, 23.00, 21.48. ESI (m/z): [M-H]<sup>-</sup> calculated from C<sub>63</sub>H<sub>88</sub>N<sub>15</sub>O<sub>9</sub>S, 1230.66; found, 1230.66.

6.9. *Val-hexyl-propargyl-Val-hexyl-propargyl-Val-hexyl-N<sub>3</sub>*. Synthesized from Fmoc-Val-OH, and 6-azidohexanoic acid. 66% yield. <sup>1</sup>H NMR:  $\delta$  (DMSO-*d*<sub>6</sub>, 2.50 ppm) 11.40 (bs, 1H), 7.66-8.69 (m, 7H), 4.08-4.43 (m, 11H), 3.290 (t, 2H), 2.02-2.29 (m, 6H), 1.09-1.84 (m, 21H), 0.66-0.99 (m, 18H). <sup>13</sup>C NMR:  $\delta$  (DMSO-*d*<sub>6</sub>, 39.52 ppm) 172.20, 171.21, 144.72, 122.60, 77.35, 57.80, 50.60, 40.18, 35.78, 34.96, 34.90, 34.19, 30.78, 30.38, 29.51, 28.26, 27.99, 25.79, 25.44, 24.87, 24.76, 19.21, 18.22. ESI (m/z): [M-H]<sup>-</sup> calculated from C<sub>39</sub>H<sub>65</sub>N<sub>14</sub>O<sub>7</sub>, 841.52; found, 841.52.

## 7. Optimized reaction conditions for the synthesis of sequence-defined oligomers based on natural and synthetic building blocks

The previous reaction conditions for the synthesis of sequence-defined oligomers were optimized for the model oligomer Kh-Kh-Kh by reducing the reaction times of each step and the amount of copper used for the cycloaddition reaction while obtaining successfully the desired oligomers.

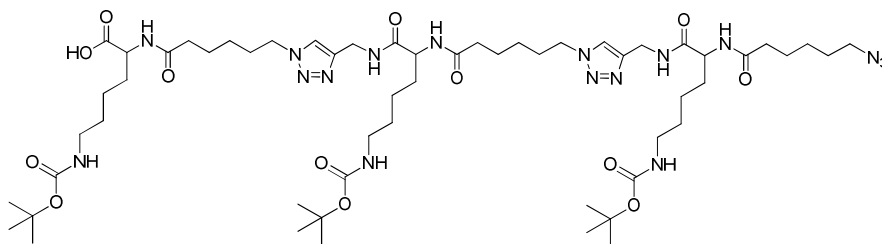

As previously the chlorotriptyl chloride resin was loaded with Fmoc-Lys(Boc)-OH as described in Section 4 and the oligomers were synthesized from successive additions of 6-azidohexanoic acid, propargylamine and Fmoc-Lys(Boc)-OH following the procedure described below until the sequence was obtained.

i) Addition of 6-azidohexanoic acid. 6-Azidohexanoic acid (3 eq. relative to the loading), HBTU (3 eq. relative to the loading), HOBt (3 eq. relative to the loading), DIPEA (6 eq. relative to the loading) and anhydrous DMF (5 mL per mmol of functional groups on the resin) were added to the peptide vessel, and agitated for 30 min. After filtration, the resin was washed 6 times with DMF and 6 times with  $\text{CH}_2\text{Cl}_2$ .

ii) Copper-assisted alkyne-azide cycloaddition with propargylamine. CuBr (0.2 eq. relative to the loading) was added to the peptide vessel, which was then degased through 3 vacuum/argon cycles. Anhydrous CH<sub>2</sub>Cl<sub>2</sub> (7 mL per mmol of functional groups on the resin) were added to the peptide vessel, followed by PMDETA (0.4 eq. relative to the loading) and propargylamine (3 eq. relative to the loading). The solution was agitated under argon for 1 h. After filtration, the resin was washed 6 times with DMF and 6 times with CH<sub>2</sub>Cl<sub>2</sub>.

iii) Addition of Fmoc-Lys(Boc)-OH. Fmoc-Lys(Boc)-OH (3 eq. relative to the loading), HBTU (3 eq. relative to the loading), HOBT (3 eq. relative to the loading), DIPEA (6 eq. relative to the loading) and anhydrous DMF (5 mL per mmol of functional groups on the resin) were added to the peptide vessel, and agitated for 30 min. After filtration, the resin was washed 6 times with DMF. The Fmoc-protecting group was removed by agitation for 3 min with a 25% piperidine cleavage solution in DMF followed by filtration and agitation with a fresh cleavage solution for 20 min. The resin was then washed 6 times with DMF and 6 times with CH<sub>2</sub>Cl<sub>2</sub>.

The oligomer was cleaved from the resin by adding a 4/1 CH<sub>2</sub>Cl<sub>2</sub>/TFE solution to the peptide vessel for 45 min (twice). The resin was filtered, washed three times with CH<sub>2</sub>Cl<sub>2</sub>, and the filtrates were collected in a clean round-bottom flask. The solution was concentrated by rotary evaporation.

*Lys(Boc)-hexyl-propargyl-Lys(Boc)-hexyl-propargyl-Lys(Boc)-hexyl-N<sub>3</sub>*. 3 cycles (Kh•Kh•Kh) 75% yield. <sup>1</sup>H NMR: δ (DMSO-*d*<sub>6</sub>, 2.50 ppm) 11.50 (bs, 1H), 7.67-8.74 (m, 7H), 6.22-6.84 (m, 3H), 3.97-4.53 (m, 11H), 3.27 (t, 2H), 2.73-2.97 (m, 6H), 1.94-2.20 (m, 6H), 0.96-1.90 (m, 63H). <sup>13</sup>C NMR: δ (DMSO-*d*<sub>6</sub>, 39.52 ppm) 172.35, 172.16, 172.06, 155.71, 144.91, 122.64, 77.45, 52.74, 50.66, 49.29, 48.66, 35.06, 34.41, 31.68, 31.26, 29.56, 29.22, 28.33, 28.05, 25.82, 25.51, 24.74, 24.66, 22.95, 22.84. ESI (m/z): [M-H]<sup>-</sup> calculated from C<sub>57</sub>H<sub>98</sub>N<sub>17</sub>O<sub>13</sub>, 1228.75; found, 1228.74.

## 8. Removal of the protecting groups of the model sequence-defined oligomer

The Boc protecting groups of the model sequence-defined oligomer Kh•Kh•Kh were removed by combining the oligomer (0.2 g, 0.16 mmol) with 1 mL of a solution of TFA/TIPS/water (95/2.5/2.5) in a round-bottom flask. The mixture was stirred at room temperature for 90 min and then precipitated into diethyl ether. The precipitate was isolated by filtration and dried under vacuum at room temperature.

*Lys-hexyl-propargyl-Lys-hexyl-propargyl-Lys-hexyl-N<sub>3</sub>*. 83% yield. <sup>1</sup>H NMR: δ (D<sub>2</sub>O, 4.79 ppm) 7.43-8.21 (m, 2H), 4.11-4.64 (m, 11H), 3.28 (t, 2H), 2.87-3.10 (m, 6H), 2.18-2.40 (m, 6H), 1.11-2.01 (m, 36H). <sup>13</sup>C NMR: δ (D<sub>2</sub>O) 176.88, 176.77, 174.10, 53.90, 52.62, 50.95, 50.37, 39.17, 35.06, 30.39, 29.96, 28.98, 27.72, 26.27, 26.23, 25.45, 25.09, 24.99, 24.77, 24.56, 22.16.

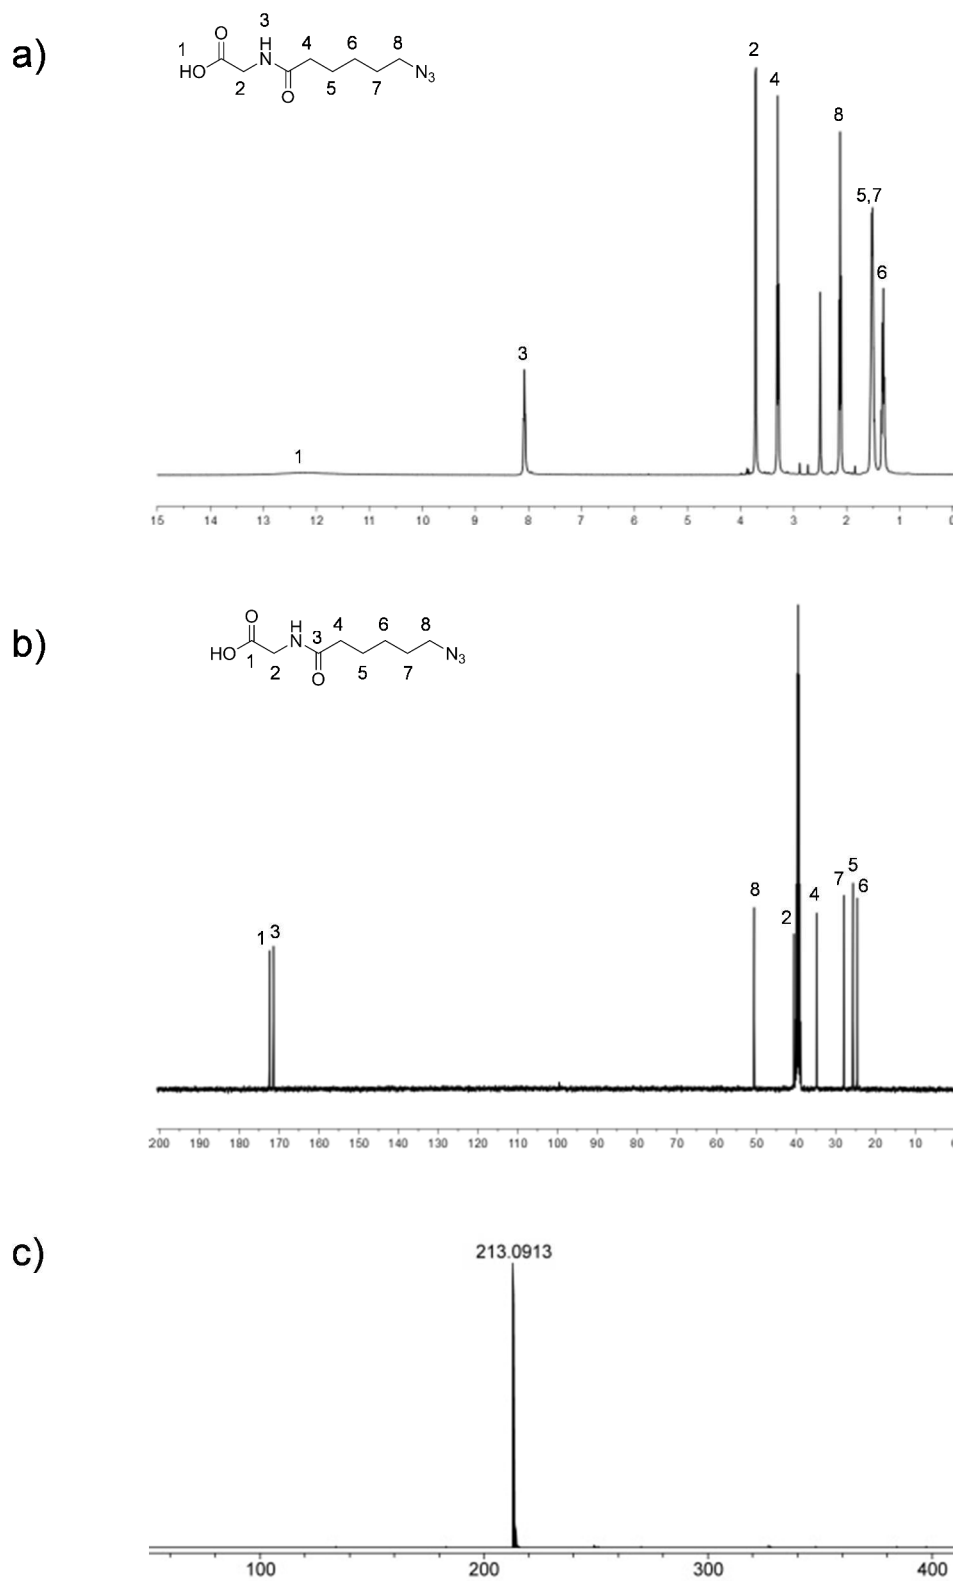

**Figure S1.** Characterization of Gly-hexyl- $\text{N}_3$  (Gh) by a)  $^1\text{H}$  and b)  $^{13}\text{C}$  NMR in  $\text{DMSO}-d_6$ , and c) ESI-MS.

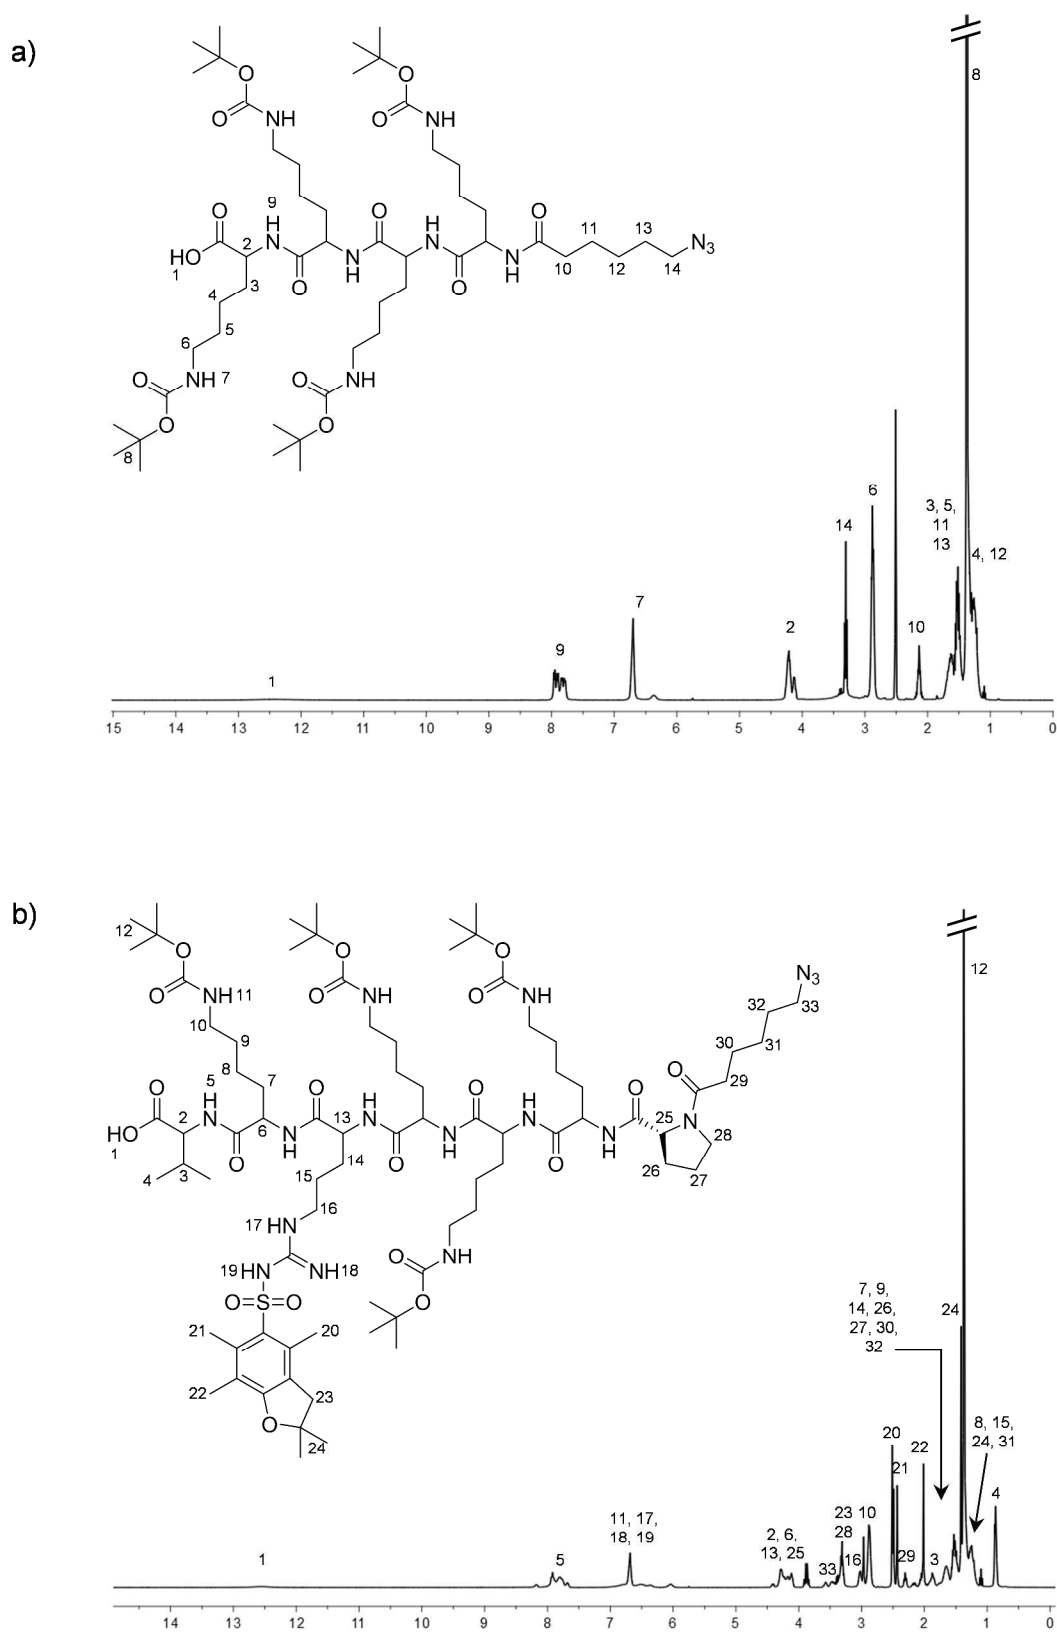

**Figure S2.**  $^1\text{H}$  NMR spectra in  $\text{DMSO}-d_6$  of a) Lys(Boc)-Lys(Boc)-Lys(Boc)-Lys(Boc)-hexyl- $\text{N}_3$  (KKKKh) and b) Val-Lys(Boc)-Arg(Pbf)-Lys(Boc)-Lys(Boc)-Lys(Boc)-Pro-hexyl- $\text{N}_3$  (VKRKKKPh).



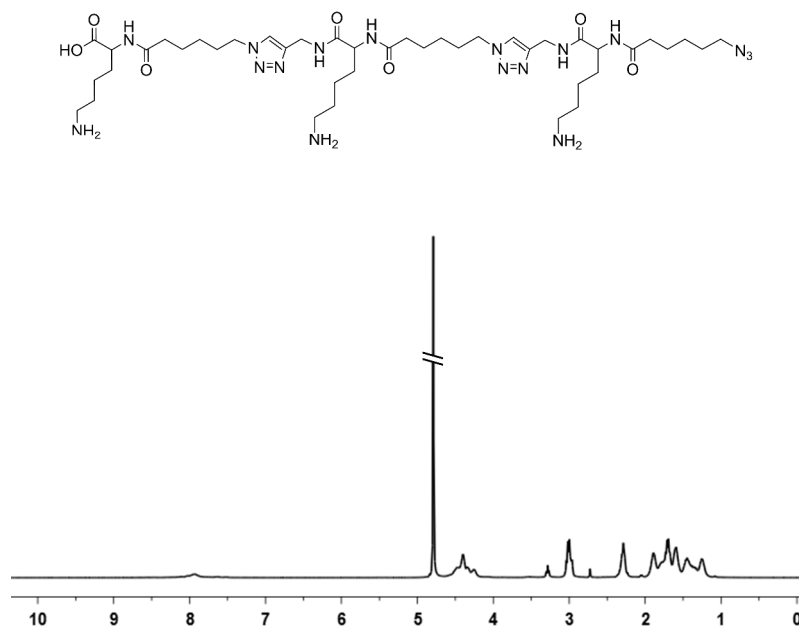

**Figure S3.** <sup>1</sup>H NMR spectrum of Lys-hexyl-propargyl-Lys-hexyl-propargyl-Lys-hexyl-N<sub>3</sub> in D<sub>2</sub>O.

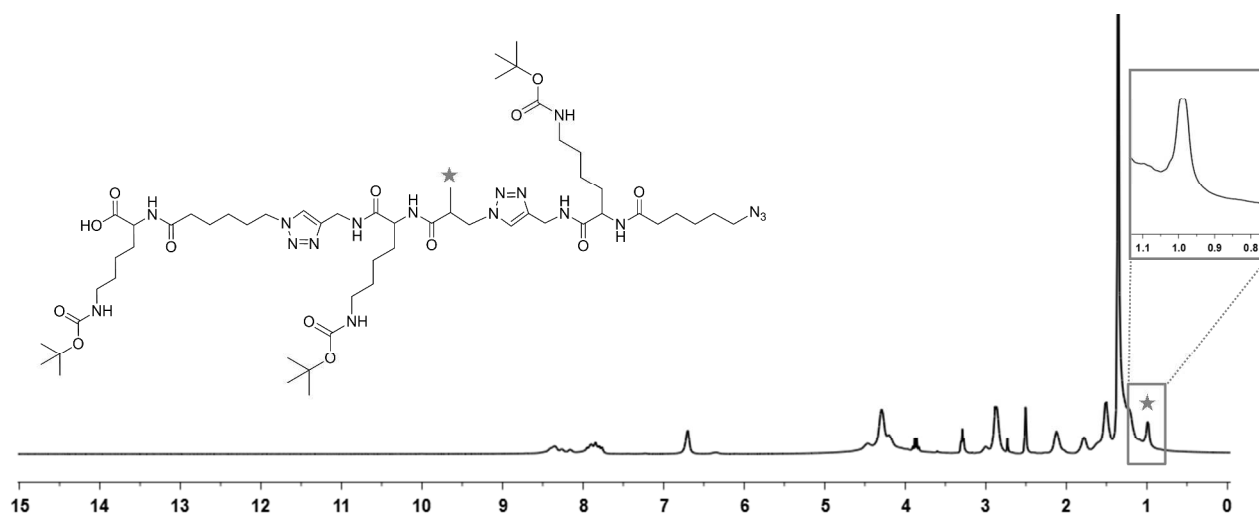

**Figure S4.** <sup>1</sup>H NMR spectrum in DMSO-*d*<sub>6</sub> of Lys(Boc)-hexyl-propargyl-Lys(Boc)-methylpropionyl-propargyl-Lys(Boc)-hexyl-N<sub>3</sub>.

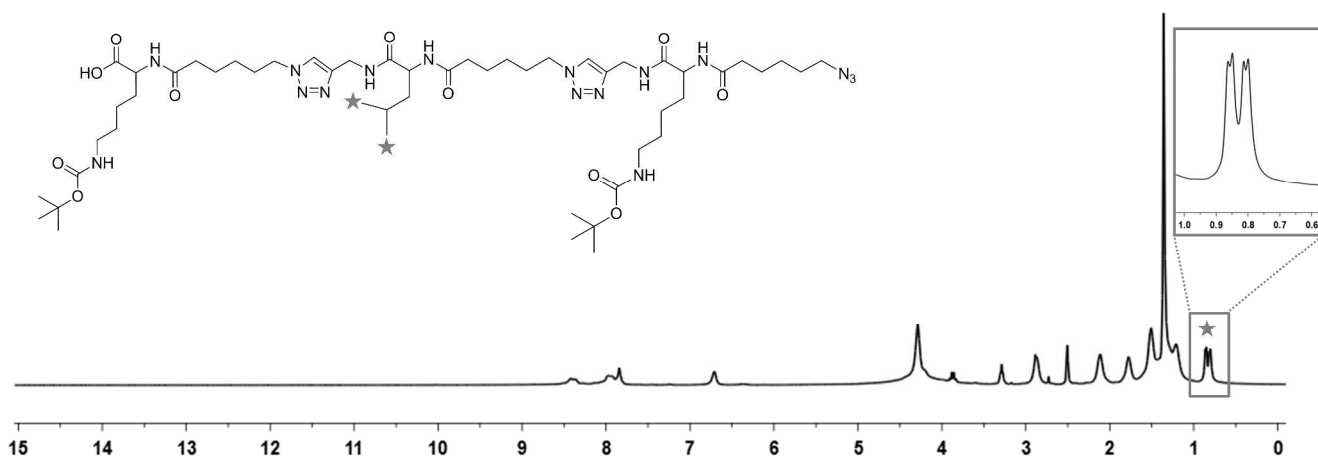

**Figure S5.** <sup>1</sup>H NMR spectrum in DMSO-*d*<sub>6</sub> of Lys(Boc)-hexyl-propargyl-Leu-hexyl-propargyl-Lys(Boc)-hexyl-N<sub>3</sub>.
